# Supplementary material for: Pulsed electromagnetic fields for the management of knee osteoarthritis: multicentre, randomised, controlled, non-inferiority trial protocol
Source: HighWire-hosted journal article supplement (doi:10.1136/bmjopen-2021-060350), 2022-09-01
Supplement: bmjopen-2021-060350supp001_data_supplement.pdf [file bmjopen-2021-060350supp001_data_supplement.pdf]

## Supplemental Materials:

### Contents

|                                      |    |
|--------------------------------------|----|
| I SPIRIT 2013 Checklist.....         | 1  |
| II List of Sites in the Trial.....   | 9  |
| III Model Patient Consent Form ..... | 10 |

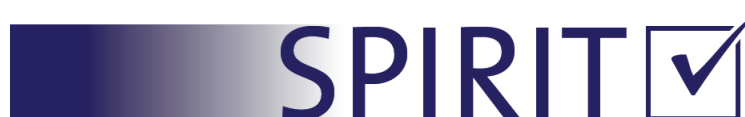

STANDARD PROTOCOL ITEMS: RECOMMENDATIONS FOR INTERVENTIONAL TRIALS

## SPIRIT 2013 Checklist: Recommended items to address in a clinical trial protocol and related documents\*

| Section/item                      | Item No | Description                                                                                                                                                                                                                                                                              | Addressed<br>on page<br>number |
|-----------------------------------|---------|------------------------------------------------------------------------------------------------------------------------------------------------------------------------------------------------------------------------------------------------------------------------------------------|--------------------------------|
| <b>Administrative information</b> |         |                                                                                                                                                                                                                                                                                          |                                |
| Title                             | 1       | Descriptive title identifying the study design, population, interventions, and, if applicable, trial acronym                                                                                                                                                                             | 1                              |
| Trial registration                | 2a      | Trial identifier and registry name. If not yet registered, name of intended registry                                                                                                                                                                                                     | 9                              |
|                                   | 2b      | All items from the World Health Organization Trial Registration Data Set                                                                                                                                                                                                                 | 9                              |
| Protocol version                  | 3       | Date and version identifier                                                                                                                                                                                                                                                              | 19                             |
| Funding                           | 4       | Sources and types of financial, material, and other support                                                                                                                                                                                                                              | 22                             |
| Roles and responsibilities        | 5a      | Names, affiliations, and roles of protocol contributors                                                                                                                                                                                                                                  | 21                             |
|                                   | 5b      | Name and contact information for the trial sponsor                                                                                                                                                                                                                                       | NA                             |
|                                   | 5c      | Role of study sponsor and funders, if any, in study design; collection, management, analysis, and interpretation of data; writing of the report; and the decision to submit the report for publication, including whether they will have ultimate authority over any of these activities | 22                             |

|    |                                                                                                                                                                                                                                                                  |       |
|----|------------------------------------------------------------------------------------------------------------------------------------------------------------------------------------------------------------------------------------------------------------------|-------|
| 5d | Composition, roles, and responsibilities of the coordinating centre, steering committee, endpoint adjudication committee, data management team, and other individuals or groups overseeing the trial, if applicable (see Item 21a for data monitoring committee) | 16-17 |
|----|------------------------------------------------------------------------------------------------------------------------------------------------------------------------------------------------------------------------------------------------------------------|-------|

## Introduction

|                          |    |                                                                                                                                                                                                           |     |
|--------------------------|----|-----------------------------------------------------------------------------------------------------------------------------------------------------------------------------------------------------------|-----|
| Background and rationale | 6a | Description of research question and justification for undertaking the trial, including summary of relevant studies (published and unpublished) examining benefits and harms for each intervention        | 6-7 |
|                          | 6b | Explanation for choice of comparators                                                                                                                                                                     | 8   |
| Objectives               | 7  | Specific objectives or hypotheses                                                                                                                                                                         | 9   |
| Trial design             | 8  | Description of trial design including type of trial (eg, parallel group, crossover, factorial, single group), allocation ratio, and framework (eg, superiority, equivalence, noninferiority, exploratory) | 9   |

## Methods: Participants, interventions, and outcomes

|                      |     |                                                                                                                                                                                              |       |
|----------------------|-----|----------------------------------------------------------------------------------------------------------------------------------------------------------------------------------------------|-------|
| Study setting        | 9   | Description of study settings (eg, community clinic, academic hospital) and list of countries where data will be collected. Reference to where list of study sites can be obtained           | 9     |
| Eligibility criteria | 10  | Inclusion and exclusion criteria for participants. If applicable, eligibility criteria for study centres and individuals who will perform the interventions (eg, surgeons, psychotherapists) | 10    |
| Interventions        | 11a | Interventions for each group with sufficient detail to allow replication, including how and when they will be administered                                                                   | 12-13 |

|                      |     |                                                                                                                                                                                                                                                                                                                                                                                |             |
|----------------------|-----|--------------------------------------------------------------------------------------------------------------------------------------------------------------------------------------------------------------------------------------------------------------------------------------------------------------------------------------------------------------------------------|-------------|
|                      | 11b | Criteria for discontinuing or modifying allocated interventions for a given trial participant (eg, drug dose change in response to harms, participant request, or improving/worsening disease)                                                                                                                                                                                 | 12, 15      |
|                      | 11c | Strategies to improve adherence to intervention protocols, and any procedures for monitoring adherence (eg, drug tablet return, laboratory tests)                                                                                                                                                                                                                              | NA          |
|                      | 11d | Relevant concomitant care and interventions that are permitted or prohibited during the trial                                                                                                                                                                                                                                                                                  | NA          |
| Outcomes             | 12  | Primary, secondary, and other outcomes, including the specific measurement variable (eg, systolic blood pressure), analysis metric (eg, change from baseline, final value, time to event), method of aggregation (eg, median, proportion), and time point for each outcome. Explanation of the clinical relevance of chosen efficacy and harm outcomes is strongly recommended | 14-15       |
| Participant timeline | 13  | Time schedule of enrolment, interventions (including any run-ins and washouts), assessments, and visits for participants. A schematic diagram is highly recommended (see Figure)                                                                                                                                                                                               | 12, table 1 |
| Sample size          | 14  | Estimated number of participants needed to achieve study objectives and how it was determined, including clinical and statistical assumptions supporting any sample size calculations                                                                                                                                                                                          | 17-18       |
| Recruitment          | 15  | Strategies for achieving adequate participant enrolment to reach target sample size                                                                                                                                                                                                                                                                                            | 11          |

### Methods: Assignment of interventions (for controlled trials)

Allocation:

|                                  |     |                                                                                                                                                                                                                                                                                                                                                          |    |
|----------------------------------|-----|----------------------------------------------------------------------------------------------------------------------------------------------------------------------------------------------------------------------------------------------------------------------------------------------------------------------------------------------------------|----|
| Sequence generation              | 16a | Method of generating the allocation sequence (eg, computer-generated random numbers), and list of any factors for stratification. To reduce predictability of a random sequence, details of any planned restriction (eg, blocking) should be provided in a separate document that is unavailable to those who enrol participants or assign interventions | 16 |
| Allocation concealment mechanism | 16b | Mechanism of implementing the allocation sequence (eg, central telephone; sequentially numbered, opaque, sealed envelopes), describing any steps to conceal the sequence until interventions are assigned                                                                                                                                                | 16 |
| Implementation                   | 16c | Who will generate the allocation sequence, who will enrol participants, and who will assign participants to interventions                                                                                                                                                                                                                                | 16 |
| Blinding (masking)               | 17a | Who will be blinded after assignment to interventions (eg, trial participants, care providers, outcome assessors, data analysts), and how                                                                                                                                                                                                                | 16 |
|                                  | 17b | If blinded, circumstances under which unblinding is permissible, and procedure for revealing a participant's allocated intervention during the trial                                                                                                                                                                                                     | 16 |

### **Methods: Data collection, management, and analysis**

|                         |     |                                                                                                                                                                                                                                                                                                                                                                                                              |    |
|-------------------------|-----|--------------------------------------------------------------------------------------------------------------------------------------------------------------------------------------------------------------------------------------------------------------------------------------------------------------------------------------------------------------------------------------------------------------|----|
| Data collection methods | 18a | Plans for assessment and collection of outcome, baseline, and other trial data, including any related processes to promote data quality (eg, duplicate measurements, training of assessors) and a description of study instruments (eg, questionnaires, laboratory tests) along with their reliability and validity, if known. Reference to where data collection forms can be found, if not in the protocol | 15 |
|-------------------------|-----|--------------------------------------------------------------------------------------------------------------------------------------------------------------------------------------------------------------------------------------------------------------------------------------------------------------------------------------------------------------------------------------------------------------|----|

|                            |     |                                                                                                                                                                                                                                                                                                                                       |       |
|----------------------------|-----|---------------------------------------------------------------------------------------------------------------------------------------------------------------------------------------------------------------------------------------------------------------------------------------------------------------------------------------|-------|
|                            | 18b | Plans to promote participant retention and complete follow-up, including list of any outcome data to be collected for participants who discontinue or deviate from intervention protocols                                                                                                                                             | N/A   |
| Data management            | 19  | Plans for data entry, coding, security, and storage, including any related processes to promote data quality (eg, double data entry; range checks for data values). Reference to where details of data management procedures can be found, if not in the protocol                                                                     | 15    |
| Statistical methods        | 20a | Statistical methods for analysing primary and secondary outcomes. Reference to where other details of the statistical analysis plan can be found, if not in the protocol                                                                                                                                                              | 18-19 |
|                            | 20b | Methods for any additional analyses (eg, subgroup and adjusted analyses)                                                                                                                                                                                                                                                              | 19    |
|                            | 20c | Definition of analysis population relating to protocol non-adherence (eg, as randomised analysis), and any statistical methods to handle missing data (eg, multiple imputation)                                                                                                                                                       | 18    |
| <b>Methods: Monitoring</b> |     |                                                                                                                                                                                                                                                                                                                                       |       |
| Data monitoring            | 21a | Composition of data monitoring committee (DMC); summary of its role and reporting structure; statement of whether it is independent from the sponsor and competing interests; and reference to where further details about its charter can be found, if not in the protocol. Alternatively, an explanation of why a DMC is not needed | 16    |

|                                 |     |                                                                                                                                                                                                                                  |     |
|---------------------------------|-----|----------------------------------------------------------------------------------------------------------------------------------------------------------------------------------------------------------------------------------|-----|
|                                 | 21b | Description of any interim analyses and stopping guidelines, including who will have access to these interim results and make the final decision to terminate the trial                                                          | 16  |
| Harms                           | 22  | Plans for collecting, assessing, reporting, and managing solicited and spontaneously reported adverse events and other unintended effects of trial interventions or trial conduct                                                | 16  |
| Auditing                        | 23  | Frequency and procedures for auditing trial conduct, if any, and whether the process will be independent from investigators and the sponsor                                                                                      | 16  |
| <b>Ethics and dissemination</b> |     |                                                                                                                                                                                                                                  |     |
| Research ethics approval        | 24  | Plans for seeking research ethics committee/institutional review board (REC/IRB) approval                                                                                                                                        | 20  |
| Protocol amendments             | 25  | Plans for communicating important protocol modifications (eg, changes to eligibility criteria, outcomes, analyses) to relevant parties (eg, investigators, REC/IRBs, trial participants, trial registries, journals, regulators) | 20  |
| Consent or assent               | 26a | Who will obtain informed consent or assent from potential trial participants or authorised surrogates, and how (see Item 32)                                                                                                     | 11  |
|                                 | 26b | Additional consent provisions for collection and use of participant data and biological specimens in ancillary studies, if applicable                                                                                            | N/A |
| Confidentiality                 | 27  | How personal information about potential and enrolled participants will be collected, shared, and maintained in order to protect confidentiality before, during, and after the trial                                             | 19  |
| Declaration of interests        | 28  | Financial and other competing interests for principal investigators for the overall trial and each study site                                                                                                                    | 22  |

|                               |     |                                                                                                                                                                                                                                                                                     |     |
|-------------------------------|-----|-------------------------------------------------------------------------------------------------------------------------------------------------------------------------------------------------------------------------------------------------------------------------------------|-----|
| Access to data                | 29  | Statement of who will have access to the final trial dataset, and disclosure of contractual agreements that limit such access for investigators                                                                                                                                     | 17  |
| Ancillary and post-trial care | 30  | Provisions, if any, for ancillary and post-trial care, and for compensation to those who suffer harm from trial participation                                                                                                                                                       | N/A |
| Dissemination policy          | 31a | Plans for investigators and sponsor to communicate trial results to participants, healthcare professionals, the public, and other relevant groups (eg, via publication, reporting in results databases, or other data sharing arrangements), including any publication restrictions | 20  |
|                               | 31b | Authorship eligibility guidelines and any intended use of professional writers                                                                                                                                                                                                      | 20  |
|                               | 31c | Plans, if any, for granting public access to the full protocol, participant-level dataset, and statistical code                                                                                                                                                                     | N/A |

## Appendices

|                            |    |                                                                                                                                                                                                |                                |
|----------------------------|----|------------------------------------------------------------------------------------------------------------------------------------------------------------------------------------------------|--------------------------------|
| Informed consent materials | 32 | Model consent form and other related documentation given to participants and authorised surrogates                                                                                             | Supplementar<br>y material III |
| Biological specimens       | 33 | Plans for collection, laboratory evaluation, and storage of biological specimens for genetic or molecular analysis in the current trial and for future use in ancillary studies, if applicable | N/A                            |

---

\*It is strongly recommended that this checklist be read in conjunction with the SPIRIT 2013 Explanation & Elaboration for important clarification on the items. Amendments to the protocol should be tracked and dated. The SPIRIT checklist is copyrighted by the SPIRIT Group under the Creative Commons "[Attribution-NonCommercial-NoDerivs 3.0 Unported](#)" license.



## List of Sites in the Trial

---

| No. | Site                                                                          |
|-----|-------------------------------------------------------------------------------|
| 1   | West China Hospital of Sichuan University                                     |
| 2   | The Second Hospital of Jilin University                                       |
| 3   | The Second Affiliated Hospital of Heilongjiang University of Chinese Medicine |
| 4   | General Hospital of Ningxia Medical University                                |
| 5   | Shanghai General Hospital                                                     |
| 6   | Zhongnan Hospital of Wuhan University                                         |
| 7   | The First Affiliated Hospital of Xinjiang Medical University                  |
| 8   | Qinghai University Affiliated Hospital                                        |
| 9   | The First Hospital of Longquanyi District of Chengdu                          |
| 10  | Mianzhu people's Hospital                                                     |
| 11  | Ya'an people's Hospital                                                       |
| 12  | Ganzi People's Hospital                                                       |
| 13  | Yibin City No. 2 People's Hospital                                            |
| 14  | Mianyang Central Hospital                                                     |
| 15  | Nanjiang people's Hospital                                                    |
| 16  | Dechang people's Hospital                                                     |
| 17  | The First Affiliated Hospital of Zhengzhou University                         |

---

# Patient Consent Form

Dear participant:

You are invited into the “Pulsed Electromagnetic Fields for the Management of Knee Osteoarthritis: Multicentre, Randomised, Controlled, Non-inferiority Trial” which has been approved by the ethics committee on biomedical research of West China Hospital of Sichuan University (#2021-220).

## 1. Why do we carry out this study?

Knee osteoarthritis (KOA) is the most common cause of pain and disability. Pulsed electromagnetic fields (PEMFs) is an available treatment. Nonetheless, the clinical effects are consistent. Thus, this study aims to determine the effect of PEMFs with specific parameters on pain relief and function improvement by comparing them with the positive control (celecoxib).

## 2. What do you need to do if you agree to participate in this study?

You will be randomly assigned to the PEMFs or usual care group. Patients in the PEMFs group will receive a 6-week PEMFs therapy, and these in the drug group will receive a 6-week Celebrex treatment. You will be required to complete the visit by telephone at baseline (before randomization), and at weeks 1, 3, 6, 10, 18, and 30 after enrolment.

## 3. These individuals are not suitable for participating in this trial, who:

- a) be diagnosed with fibromyalgia or other arthritis, like rheumatoid arthritis or inflammatory arthritis.
- b) have a history of knee surgery or intra-articular injection in the past 6 months.
- c) have treatments of steroids, methotrexate, or azathioprine.
- d) previously used PEMFs in treating similar symptoms.
- e) received any analgesics during one-week preceding inclusion.
- f) be with any unstable medical or psychiatric illness.

## 4. What are the potential risks and possible adverse events of participating in the study?

**Potential risks:** The treatment options may not alleviate your existing symptoms due to personal emotions, anxiety, and other risk factors, and may aggravate the anxiety symptoms or fear of the disease although they are based on evidence-based medical guidelines and previous research evidence.

**Adverse events:**

- ✧ Skin allergy symptoms due to personal constitution reasons or using the patch.
- ✧ Gastrointestinal discomfort due to taking pain relief drugs.

**Risk prevention and disposal:** Researchers and medical workers have medical qualifications and complete the standardized training. During this process, patients will be free of charge and will receive appropriate examination and treatment at belonging site if suffered adverse events.

#### 5. What are benefits you can take from the study?

- ✧ Free visit and treatment.
- ✧ Improvement in symptoms.
- ✧ Reduction dependence on drugs and avoid side effects caused by medicine.

#### 6. Are there any fees need to pay during the study?

Participant in this study is completely free of charge, and patients can receive a transportation subsidy of up to ¥400 with the ticket.

#### 7. Is personal information confidential?

Your research data will be kept in the West China Hospital of Sichuan University, and your medical records will be accessible to researchers, research authorities, and ethics review committees. Any public reports on the findings of this study will not disclose your personal identity.

#### 8. Must I participate in a study?

Participation in this study is completely voluntary, and you may refuse to participate in the study or withdraw from this study at any stage of the trial without discrimination or retaliation, and your medical treatment and rights will not be affected. If you decide to withdraw from this study, please contact your doctor for proper diagnosis and treatment of the disease.

**Patient Statement:**

I have read the above presentation on this study, and my researchers have fully explained to me the purpose of this study, its operational process, and the possible risks and potential benefits of participating in this study and answered all my relevant questions.

I understand the purpose of this study and I am free to withdraw at any time without medical cares or legal rights being affected. I am voluntary to participate in this study.

I understand that results of my visits may be shared with the research team of West China Hospital of Sichuan University.

I agree to allow any information provided to be medical research upon the understanding that my identity will remain anonymous wherever possible.

**Please indicate your wishes in the below scenarios:**

Please tick or initial yes or no:

Please tick ✓ or initial

I agree for my details to be shared and used in further research that be running by West China Hospital of Sichuan University

YES

NO

Patient (to be completed by the patient):

Signature: \_\_\_\_\_

Name (block letters): \_\_\_\_\_

Date: \_\_\_\_\_

Phone: \_\_\_\_\_

Legal representative (block letters, if applicable): \_\_\_\_\_

Relationship with patient: \_\_\_\_\_

Witness (block letters, if applicable): \_\_\_\_\_

Date: \_\_\_\_\_

**Investigator Statement:**

I have explained the request to the above-named patient, particularly, the ethical principles, risks, benefits, free, voluntariness and confidentiality that may arise from participating in this study. And he/she has indicated his/her willingness for participating in this study.

Signature: \_\_\_\_\_

Name (block letters): \_\_\_\_\_

Date: \_\_\_\_\_

Ethics Committee on Biomedical Research,

West China Hospital of Sichuan University

Tel: 028-85422654, 028-85423237

(1 copy for patient; 1 held in patient notes, original stored in Investigator Site File)
